# Supplementary material for: Chance and necessity in the evolution of minimal metabolic networks
Source: Springer Nature journal article supplement (doi:10.1038/nature04568), 2006-03-01
Supplement: 41586_2006_BFnature04568_MOESM2_ESM.pdf [file 41586_2006_BFnature04568_MOESM2_ESM.pdf]

### Supplementary Table 13. Metabolic gene content of endosymbionts and simulated minimal genomes

Presence (+) or absence (-) in endosymbiotic genomes of 904 genes annotated in the stoichiometric model of *E. coli*.

Figure 1c in the main text is based on results of the general simulations (column 7).

Four genes (b1416, b1417, b3767, b3768) are not annotated appropriately in the NCBI genome database, and therefore these genes were excluded from all analysis.

| Blattner names ( <i>E.coli</i> ) | Gene name ( <i>E.coli</i> ) | Presence/Absence of the ortholog in endosymbiont genomes |                               |                    |                                   | Fraction of simulated minimal gene sets with the presence of the gene |                                  |                            |
|----------------------------------|-----------------------------|----------------------------------------------------------|-------------------------------|--------------------|-----------------------------------|-----------------------------------------------------------------------|----------------------------------|----------------------------|
|                                  |                             | <i>Buchnera aphidicola</i>                               | <i>Buchnera aphidicola</i> Sg | <i>Buchnera</i> sp | <i>Wigglesworthia brevipalpis</i> | General (nutrient rich) conditions                                    | <i>Wigglesworthia</i> conditions | <i>Buchnera</i> conditions |
| b0002                            | thrA                        | +                                                        | +                             | +                  | +                                 | 0.34                                                                  | 0.36                             | 0.498                      |
| b0003                            | thrB                        | +                                                        | +                             | +                  | -                                 | 0.342                                                                 | 0.092                            | 0.606                      |
| b0004                            | thrC                        | +                                                        | +                             | +                  | -                                 | 0.342                                                                 | 0.092                            | 0.606                      |
| b0007                            | yaaJ                        | -                                                        | -                             | -                  | -                                 | 0.01                                                                  | 0.008                            | 0                          |
| b0008                            | talB                        | -                                                        | -                             | -                  | -                                 | 0.494                                                                 | 0.444                            | 0.512                      |
| b0019                            | nhaA                        | -                                                        | -                             | -                  | +                                 | 0.268                                                                 | 0.004                            | 0                          |
| b0025                            | ribF                        | -                                                        | +                             | +                  | +                                 | 1                                                                     | 1                                | 1                          |
| b0029                            | lytB                        | +                                                        | +                             | +                  | +                                 | 0                                                                     | 1                                | 0                          |
| b0031                            | dapB                        | +                                                        | +                             | +                  | +                                 | 0.704                                                                 | 1                                | 1                          |
| b0032                            | carA                        | +                                                        | +                             | +                  | +                                 | 0                                                                     | 0                                | 0.012                      |
| b0033                            | carB                        | +                                                        | +                             | +                  | +                                 | 0                                                                     | 0                                | 0.012                      |
| b0036                            | caiD                        | -                                                        | -                             | -                  | -                                 | 0                                                                     | 0                                | 0                          |
| b0038                            | caiB                        | -                                                        | -                             | -                  | -                                 | 0                                                                     | 0                                | 0                          |
| b0040                            | caiT                        | -                                                        | -                             | -                  | -                                 | 0                                                                     | 0                                | 0                          |
| b0048                            | folA                        | +                                                        | +                             | +                  | +                                 | 1                                                                     | 1                                | 1                          |
| b0049                            | apaH                        | +                                                        | +                             | +                  | +                                 | 0                                                                     | 0                                | 0                          |
| b0052                            | pdxA                        | -                                                        | -                             | -                  | +                                 | 0                                                                     | 1                                | 0                          |
| b0061                            | araD                        | -                                                        | -                             | -                  | -                                 | 0                                                                     | 0                                | 0                          |
| b0062                            | araA                        | -                                                        | -                             | -                  | -                                 | 0                                                                     | 0                                | 0                          |
| b0063                            | araB                        | -                                                        | -                             | -                  | -                                 | 0                                                                     | 0                                | 0                          |
| b0066                            | sfuC                        | -                                                        | -                             | -                  | -                                 | 0                                                                     | 0                                | 0                          |
| b0067                            | sfuB                        | -                                                        | -                             | -                  | -                                 | 0                                                                     | 0                                | 0                          |
| b0068                            | sfuA                        | -                                                        | -                             | -                  | -                                 | 0                                                                     | 0                                | 0                          |
| b0071                            | leuD                        | +                                                        | -                             | +                  | -                                 | 0.802                                                                 | 0.744                            | 1                          |
| b0072                            | leuC                        | +                                                        | -                             | +                  | -                                 | 0.802                                                                 | 0.744                            | 1                          |
| b0073                            | leuB                        | +                                                        | -                             | +                  | -                                 | 0.802                                                                 | 0.744                            | 1                          |
| b0074                            | leuA                        | +                                                        | -                             | +                  | -                                 | 0.802                                                                 | 0.744                            | 1                          |
| b0077                            | ilvI                        | +                                                        | +                             | +                  | -                                 | 0.368                                                                 | 0.406                            | 0.414                      |

|       |      |   |   |   |   |       |       |       |
|-------|------|---|---|---|---|-------|-------|-------|
| b0078 | ilvH | + | + | + | - | 0.368 | 0.406 | 0.414 |
| b0085 | murE | + | - | + | + | 1     | 1     | 1     |
| b0086 | murF | + | - | + | + | 1     | 1     | 1     |
| b0087 | mraY | + | - | + | + | 1     | 1     | 1     |
| b0088 | murD | + | + | + | + | 1     | 1     | 1     |
| b0090 | murG | + | + | + | + | 1     | 1     | 1     |
| b0091 | murC | + | - | + | + | 1     | 1     | 1     |
| b0092 | ddlB | + | + | - | - | 0.53  | 0.492 | 0.51  |
| b0096 | lpxC | - | - | - | + | 1     | 1     | 1     |
| b0099 | mutT | - | + | + | - | 0.488 | 0.498 | 0.48  |
| b0104 | guaC | + | + | + | - | 0     | 0     | 0     |
| b0109 | nadC | - | - | - | + | 0.198 | 0.188 | 1     |
| b0112 | aroP | - | - | - | - | 0.636 | 0.7   | 0     |
| b0114 | aceE | + | + | + | + | 0     | 0.002 | 1     |
| b0115 | aceF | + | + | + | + | 0     | 0.002 | 1     |
| b0116 | lpdA | + | + | + | + | 1     | 0.934 | 1     |
| b0118 | acnB | - | - | - | - | 0.478 | 0.458 | 0.484 |
| b0120 | speD | - | + | + | - | 0.184 | 1     | 1     |
| b0121 | speE | - | + | + | - | 0.186 | 1     | 1     |
| b0124 | gcd  | - | - | - | - | 0     | 0     | 0     |
| b0125 | hpt  | - | + | + | - | 0.03  | 0.088 | 0.054 |
| b0126 | yadF | - | - | - | - | 0.514 | 0.506 | 0.536 |
| b0131 | panD | - | - | - | - | 0.27  | 1     | 1     |
| b0133 | panC | - | + | + | + | 0.27  | 1     | 1     |
| b0134 | panB | - | + | + | + | 0.27  | 1     | 1     |
| b0142 | folK | - | - | - | + | 1     | 1     | 1     |
| b0154 | hemL | - | - | - | + | 0     | 1     | 0     |
| b0158 | yadT | - | - | - | - | 0     | 0     | 0     |
| b0159 | mtn  | + | + | + | + | 0.184 | 1     | 1     |
| b0160 | dgt  | - | - | - | - | 0     | 0     | 0     |
| b0166 | dapD | + | + | + | + | 0.704 | 1     | 1     |
| b0171 | pyrH | + | + | + | + | 0.668 | 0.6   | 0.618 |
| b0173 | dxr  | - | + | + | + | 0     | 1     | 0     |
| b0174 | uppS | + | + | + | + | 0     | 0     | 0     |
| b0175 | cdsA | - | - | - | + | 1     | 1     | 1     |
| b0179 | lpxD | - | - | - | + | 1     | 1     | 1     |
| b0180 | fabZ | + | + | - | - | 1     | 1     | 1     |
| b0181 | lpxA | - | - | - | + | 1     | 1     | 1     |
| b0182 | lpxB | - | - | - | + | 1     | 1     | 1     |
| b0185 | accA | - | - | - | + | 1     | 1     | 1     |
| b0186 | ldcC | - | - | - | - | 0     | 0     | 0     |

|       |      |   |   |   |   |       |       |       |
|-------|------|---|---|---|---|-------|-------|-------|
| b0197 | yaeC | - | - | - | - | 0.858 | 0.808 | 0     |
| b0198 | yaeE | - | - | - | - | 0.858 | 0.808 | 0     |
| b0199 | abc  | - | - | - | - | 0.858 | 0.808 | 0     |
| b0200 | yaeD | - | - | - | - | 1     | 1     | 1     |
| b0207 | yafB | - | - | - | - | 0     | 0     | 0     |
| b0212 | gloB | + | + | + | + | 0     | 0     | 0     |
| b0221 | fadF | - | - | - | - | 0     | 0     | 0     |
| b0222 | gmhA | - | + | + | - | 1     | 1     | 1     |
| b0238 | gpt  | + | + | + | - | 0.032 | 0.104 | 0.046 |
| b0242 | proB | - | - | - | - | 0.766 | 0.728 | 0.388 |
| b0243 | proA | - | - | - | - | 0.766 | 0.728 | 0.388 |
| b0273 | argF | + | + | + | - | 0.4   | 0.388 | 0.502 |
| b0312 | betB | - | - | - | - | 0     | 0     | 0     |
| b0314 | betT | - | - | - | - | 0     | 0     | 0     |
| b0323 | yahI | - | - | - | - | 0.314 | 0.378 | 0.302 |
| b0331 | prpB | - | - | - | - | 0     | 0     | 0.002 |
| b0333 | prpC | - | - | - | - | 0     | 0     | 0.002 |
| b0334 | prpD | - | - | - | - | 0     | 0     | 0.002 |
| b0335 | prpE | - | - | - | - | 0     | 0.04  | 0.014 |
| b0336 | codB | - | - | - | - | 0.08  | 0.088 | 0     |
| b0337 | codA | - | - | - | - | 0.094 | 0.122 | 0.122 |
| b0339 | cynT | - | - | - | - | 0.486 | 0.494 | 0.464 |
| b0340 | cynS | - | - | - | - | 0     | 0     | 0     |
| b0341 | cynX | - | - | - | - | 0     | 0     | 0     |
| b0343 | lacY | - | - | - | - | 0     | 0     | 0     |
| b0344 | lacZ | - | - | - | - | 0     | 0     | 0     |
| b0347 | mhpA | - | - | - | - | 0     | 0     | 0     |
| b0348 | mhpB | - | - | - | - | 0     | 0     | 0     |
| b0349 | mhpC | - | - | - | - | 0     | 0     | 0     |
| b0350 | mhpD | - | - | - | - | 0     | 0     | 0     |
| b0351 | mhpF | - | - | - | - | 0.02  | 0     | 0.044 |
| b0352 | mhpE | - | - | - | - | 0     | 0     | 0     |
| b0353 | mhpT | - | - | - | - | 0     | 0     | 0     |
| b0356 | adhC | - | - | - | - | 0.01  | 0.016 | 0.008 |
| b0365 | tauA | - | - | - | - | 0     | 0     | 0     |
| b0366 | tauB | - | - | - | - | 0     | 0     | 0     |
| b0367 | tauC | - | - | - | - | 0     | 0     | 0     |
| b0368 | tauD | - | - | - | - | 0     | 0     | 0     |
| b0369 | hemB | - | - | - | + | 0     | 1     | 0     |
| b0381 | ddlA | - | - | - | + | 0.47  | 0.508 | 0.49  |
| b0386 | proC | - | - | - | + | 0.912 | 0.892 | 1     |

|       |      |   |   |   |   |       |       |       |
|-------|------|---|---|---|---|-------|-------|-------|
| b0388 | aroL | - | - | - | - | 0.49  | 0.514 | 0.52  |
| b0401 | brnQ | - | - | - | + | 0.84  | 0.856 | 0     |
| b0403 | malZ | - | - | - | - | 0.004 | 0     | 0     |
| b0414 | ribD | + | + | + | + | 1     | 1     | 1     |
| b0415 | ribH | + | + | + | + | 1     | 1     | 1     |
| b0417 | thiL | - | + | + | + | 0     | 0     | 0     |
| b0418 | pgpA | - | - | - | + | 0.524 | 0.49  | 0.46  |
| b0420 | dxs  | - | + | + | + | 0     | 1     | 0     |
| b0421 | ispA | - | + | + | + | 0     | 1     | 0     |
| b0423 | thiI | - | - | - | - | 0     | 1     | 0     |
| b0425 | panE | - | - | - | + | 0.002 | 0.03  | 0     |
| b0428 | cyoE | + | + | + | + | 0     | 1     | 0     |
| b0429 | cyoD | + | + | + | + | 1     | 1     | 1     |
| b0430 | cyoC | + | + | + | + | 1     | 1     | 1     |
| b0431 | cyoB | + | + | + | + | 1     | 1     | 1     |
| b0432 | cyoA | + | + | + | + | 1     | 1     | 1     |
| b0451 | amtB | - | - | - | - | 1     | 1     | 1     |
| b0469 | apt  | - | - | - | - | 0.036 | 0.186 | 0.126 |
| b0474 | adk  | + | + | + | + | 1     | 1     | 1     |
| b0475 | hemH | - | - | - | + | 0     | 1     | 0     |
| b0477 | gsk  | - | - | - | - | 0.314 | 0.224 | 0     |
| b0480 | ushA | - | - | - | - | 1     | 1     | 1     |
| b0485 | ybaS | - | - | - | - | 0     | 0     | 0     |
| b0505 | allA | - | - | - | - | 0     | 0     | 0     |
| b0507 | gcl  | - | - | - | - | 0     | 0.012 | 0.014 |
| b0508 | hyi  | - | - | - | - | 0     | 0     | 0.004 |
| b0509 | glxR | - | - | - | - | 0     | 0.006 | 0.008 |
| b0511 | allP | - | - | - | - | 0     | 0     | 0     |
| b0512 | allB | - | - | - | - | 0     | 0     | 0     |
| b0514 | glxK | - | - | - | - | 0     | 0.01  | 0.012 |
| b0516 | allC | - | - | - | - | 0     | 0     | 0     |
| b0521 | arcC | - | - | - | - | 0.35  | 0.272 | 0.354 |
| b0522 | purK | - | - | - | + | 0.72  | 0.846 | 1     |
| b0523 | purE | - | - | - | + | 0.72  | 0.846 | 1     |
| b0529 | folD | + | + | + | + | 1     | 1     | 1     |
| b0576 | pheP | - | - | - | - | 0.038 | 0.04  | 0     |
| b0583 | entD | - | - | - | - | 0     | 0     | 0     |
| b0586 | entF | - | - | - | - | 0     | 0     | 0     |
| b0593 | entC | - | - | - | - | 0     | 0     | 0     |
| b0594 | entE | - | - | - | - | 0     | 0     | 0     |
| b0595 | entB | - | - | - | - | 0     | 0     | 0     |

|       |      |   |   |   |   |       |       |       |
|-------|------|---|---|---|---|-------|-------|-------|
| b0596 | entA | - | - | - | - | 0     | 0     | 0     |
| b0612 | citT | - | - | - | - | 0     | 0     | 0     |
| b0615 | citF | - | - | - | - | 0     | 0     | 0     |
| b0616 | citE | - | - | - | - | 0     | 0     | 0     |
| b0617 | citD | - | - | - | - | 0     | 0     | 0     |
| b0621 | dcuC | - | - | - | - | 0     | 0     | 0     |
| b0638 | phpB | - | - | - | - | 0     | 0     | 0     |
| b0639 | nadD | - | + | + | + | 1     | 1     | 1     |
| b0652 | gltL | - | - | - | + | 0     | 0     | 0     |
| b0653 | gltK | - | - | - | + | 0     | 0     | 0     |
| b0654 | gltJ | - | - | - | + | 0     | 0     | 0     |
| b0655 | gltI | - | - | - | - | 0     | 0     | 0     |
| b0662 | ubiF | - | - | - | + | 0     | 1     | 0     |
| b0674 | asnB | - | - | - | + | 0.066 | 0.086 | 0.306 |
| b0677 | nagA | - | - | - | - | 0.028 | 0     | 0     |
| b0678 | nagB | - | - | + | - | 0     | 0     | 0     |
| b0679 | nagE | - | - | - | - | 0.02  | 0     | 0     |
| b0688 | pgm  | - | - | - | + | 0.504 | 0.548 | 0.476 |
| b0692 | potE | - | - | - | - | 0.686 | 0.372 | 0     |
| b0693 | speF | - | - | - | - | 0.014 | 0.45  | 0.45  |
| b0696 | kdpC | - | - | - | - | 0     | 0     | 0     |
| b0697 | kdpB | - | - | - | - | 0     | 0     | 0     |
| b0698 | kdpA | - | - | - | - | 0     | 0     | 0     |
| b0720 | gltA | - | - | - | - | 1     | 1     | 1     |
| b0721 | sdhC | - | - | - | + | 1     | 1     | 1     |
| b0722 | sdhD | - | - | - | + | 1     | 1     | 1     |
| b0723 | sdhA | - | - | - | + | 1     | 1     | 1     |
| b0724 | sdhB | - | - | - | + | 1     | 1     | 1     |
| b0726 | sucA | + | + | + | + | 1     | 0.932 | 1     |
| b0727 | sucB | + | + | + | + | 1     | 0.932 | 1     |
| b0728 | sucC | - | - | - | + | 0.956 | 0.908 | 0.692 |
| b0729 | sucD | - | - | - | + | 0.956 | 0.908 | 0.692 |
| b0733 | cydA | - | - | - | - | 0     | 0     | 0     |
| b0734 | cydB | - | - | - | - | 0     | 0     | 0     |
| b0750 | nadA | - | - | - | + | 0.198 | 0.188 | 1     |
| b0751 | pnuC | - | - | - | - | 0.546 | 0.67  | 0     |
| b0754 | aroG | - | - | - | - | 0.312 | 0.304 | 0.326 |
| b0755 | gpmA | + | + | + | + | 0.34  | 0.362 | 0.32  |
| b0757 | galK | - | - | - | - | 0     | 0     | 0     |
| b0758 | galT | - | - | - | - | 0.002 | 0.002 | 0     |
| b0759 | galE | - | - | - | - | 0.002 | 0.002 | 0     |

|       |      |   |   |   |   |       |       |       |
|-------|------|---|---|---|---|-------|-------|-------|
| b0774 | bioA | + | + | + | + | 0     | 1     | 0     |
| b0775 | bioB | + | + | + | + | 0     | 1     | 0     |
| b0776 | bioF | + | - | - | + | 0     | 1     | 0     |
| b0778 | bioD | + | - | + | + | 0     | 1     | 0     |
| b0809 | glnQ | - | - | - | - | 0     | 0     | 0     |
| b0810 | glnP | - | - | - | - | 0     | 0     | 0     |
| b0811 | glnH | - | - | - | - | 0     | 0     | 0     |
| b0825 | fsa  | - | - | - | - | 0.248 | 0.212 | 0.138 |
| b0828 | ybiK | - | - | - | - | 0     | 0     | 0     |
| b0854 | potF | - | - | - | - | 0.01  | 0     | 0     |
| b0855 | potG | - | - | - | - | 0.01  | 0     | 0     |
| b0856 | potH | - | - | - | - | 0.01  | 0     | 0     |
| b0857 | potI | - | - | - | - | 0.01  | 0     | 0     |
| b0860 | artJ | - | - | - | - | 0.024 | 0.02  | 0     |
| b0861 | artM | - | - | - | - | 0.024 | 0.02  | 0     |
| b0862 | artQ | - | - | - | - | 0.024 | 0.02  | 0     |
| b0864 | artP | - | - | - | - | 0.024 | 0.02  | 0     |
| b0870 | ltaA | - | - | - | - | 0     | 0     | 0     |
| b0871 | poxB | - | - | - | - | 0     | 0     | 0     |
| b0888 | trxB | + | + | + | + | 1     | 1     | 1     |
| b0894 | dmsA | - | - | - | - | 0     | 0     | 0     |
| b0895 | dmsB | - | - | - | - | 0     | 0     | 0     |
| b0896 | dmsC | - | - | - | - | 0     | 0     | 0     |
| b0902 | pflA | - | - | - | - | 0     | 0     | 0.064 |
| b0903 | pflB | - | - | - | - | 0     | 0     | 0.064 |
| b0904 | focA | - | - | - | - | 0.008 | 0.012 | 0.08  |
| b0907 | serC | + | + | + | + | 1     | 1     | 1     |
| b0908 | aroA | + | + | + | - | 1     | 1     | 1     |
| b0910 | cmk  | + | - | - | + | 0.968 | 0.942 | 0.792 |
| b0915 | lpxK | - | - | - | + | 1     | 1     | 1     |
| b0918 | kdsB | - | - | - | + | 1     | 1     | 1     |
| b0928 | aspC | - | - | - | + | 1     | 1     | 1     |
| b0931 | pncB | - | + | + | - | 0.256 | 0.142 | 0     |
| b0945 | pyrD | - | + | + | + | 0.892 | 0.82  | 1     |
| b0954 | fabA | - | - | - | + | 1     | 1     | 1     |
| b0963 | mgsA | - | - | - | - | 0     | 0     | 0     |
| b0972 | hyaA | - | - | - | - | 0     | 0     | 0     |
| b0973 | hyaB | - | - | - | - | 0     | 0     | 0     |
| b0974 | hyaC | - | - | - | - | 0     | 0     | 0     |
| b0996 | torC | - | - | - | - | 0     | 0     | 0     |
| b0997 | torA | - | - | - | - | 0     | 0     | 0     |

|       |       |   |   |   |   |       |       |       |
|-------|-------|---|---|---|---|-------|-------|-------|
| b1002 | agp   | - | - | - | - | 0     | 0     | 0     |
| b1006 | ycdG  | - | - | - | - | 0.016 | 0.052 | 0     |
| b1014 | putA  | - | - | - | + | 0     | 0.002 | 0     |
| b1015 | putP  | - | - | - | - | 0.036 | 0.034 | 0     |
| b1033 | ycdW  | - | - | - | - | 0     | 0     | 0.002 |
| b1054 | lpxL  | - | - | - | - | 1     | 1     | 1     |
| b1062 | pyrC  | - | + | + | + | 0.892 | 0.82  | 1     |
| b1091 | fabH  | - | - | - | - | 0.904 | 0.888 | 0.558 |
| b1092 | fabD  | + | + | - | + | 1     | 1     | 1     |
| b1093 | fabG  | + | + | + | + | 1     | 1     | 1     |
| b1095 | fabF  | - | - | - | - | 1     | 1     | 1     |
| b1096 | pabC  | - | - | - | - | 1     | 1     | 1     |
| b1098 | tmk   | + | + | + | + | 1     | 1     | 1     |
| b1101 | ptsG  | + | + | + | - | 0.002 | 0     | 0.374 |
| b1109 | ndh   | - | - | - | + | 0     | 0     | 0     |
| b1123 | potD  | - | - | - | - | 0.366 | 0     | 0     |
| b1124 | potC  | - | - | - | - | 0.366 | 0     | 0     |
| b1125 | potB  | - | - | - | - | 0.366 | 0     | 0     |
| b1126 | potA  | - | - | - | - | 0.366 | 0     | 0     |
| b1131 | purB  | + | + | + | + | 0.794 | 0.888 | 1     |
| b1136 | icdA  | - | - | - | - | 1     | 1     | 1     |
| b1186 | nhaB  | - | - | - | - | 0.204 | 0.006 | 0.002 |
| b1189 | dadA  | - | - | - | - | 0     | 0.002 | 0     |
| b1190 | dadX  | - | - | - | + | 0.506 | 0.474 | 0.528 |
| b1197 | treA  | - | - | - | - | 0     | 0     | 0     |
| b1198 | dhaH  | - | - | - | - | 0.01  | 0.012 | 0.106 |
| b1199 | dhaK2 | - | - | - | - | 0.01  | 0.012 | 0.106 |
| b1200 | dhaK1 | - | - | - | - | 0.01  | 0.012 | 0.106 |
| b1207 | prsA  | + | + | + | + | 1     | 1     | 1     |
| b1208 | ispE  | - | + | + | + | 0     | 1     | 0     |
| b1210 | hemA  | - | - | - | + | 0     | 1     | 0     |
| b1215 | kdsA  | - | - | - | + | 1     | 1     | 1     |
| b1216 | chaA  | - | - | - | - | 0.27  | 0.024 | 0.004 |
| b1223 | narK  | - | - | - | - | 0     | 0     | 0.002 |
| b1224 | narG  | - | - | - | - | 0     | 0     | 0     |
| b1225 | narH  | - | - | - | - | 0     | 0     | 0     |
| b1226 | narJ  | - | - | - | - | 0     | 0     | 0     |
| b1227 | narI  | - | - | - | - | 0     | 0     | 0     |
| b1232 | purU  | - | - | - | + | 0.85  | 0.86  | 0.494 |
| b1236 | galU  | - | - | - | + | 0.55  | 0.464 | 0.526 |
| b1238 | tdk   | - | - | - | - | 0.212 | 0.286 | 0.13  |

|       |        |   |   |   |   |       |       |       |
|-------|--------|---|---|---|---|-------|-------|-------|
| b1241 | adhE   | - | - | - | - | 1     | 1     | 0     |
| b1249 | cls    | + | + | + | + | 1     | 1     | 1     |
| b1260 | trpA   | + | + | + | - | 0.176 | 0.176 | 1     |
| b1261 | trpB   | + | + | + | - | 0.176 | 0.176 | 1     |
| b1262 | trpC   | + | + | + | - | 0.026 | 0.042 | 1     |
| b1263 | trpD   | + | + | + | - | 0.026 | 0.042 | 1     |
| b1264 | trpE   | + | - | + | - | 0.026 | 0.042 | 1     |
| b1270 | btuR   | - | - | - | - | 0     | 0     | 0     |
| b1276 | acnA   | - | - | - | - | 0.522 | 0.542 | 0.516 |
| b1277 | ribA   | + | + | + | + | 1     | 1     | 1     |
| b1278 | pgpB   | - | - | - | - | 0.476 | 0.51  | 0.54  |
| b1281 | pyrF   | + | + | + | + | 0.892 | 0.82  | 1     |
| b1288 | fabI   | + | + | + | + | 1     | 1     | 1     |
| b1297 | ycjK   | - | - | - | - | 0.528 | 0.532 | 0.51  |
| b1300 | aldH   | - | - | - | - | 0.002 | 0     | 0.002 |
| b1302 | goaG   | - | - | - | - | 0.112 | 0.062 | 0.058 |
| b1363 | trkG   | - | - | - | - | 0     | 0     | 0     |
| b1380 | ldhA   | - | - | - | - | 0     | 0     | 0     |
| b1385 | feaB   | - | - | - | - | 0     | 0     | 0     |
| b1386 | tynA   | - | - | - | - | 0     | 0     | 0     |
| b1398 | paaK   | - | - | - | - | 0     | 0     | 0     |
| b1415 | aldA   | - | - | - | - | 1     | 1     | 1     |
| b1416 | gapC_2 | ? | ? | ? | ? | 0.348 | 0.302 | 0.298 |
| b1417 | gapC_1 | ? | ? | ? | ? | 0.348 | 0.302 | 0.298 |
| b1440 | ydcS   | - | - | - | - | 0.45  | 0     | 0     |
| b1441 | ydcT   | - | - | - | - | 0.45  | 0     | 0     |
| b1442 | ydcU   | - | - | - | - | 0.45  | 0     | 0     |
| b1443 | ydcV   | - | - | - | - | 0.45  | 0     | 0     |
| b1469 | narU   | - | - | - | - | 0     | 0     | 0     |
| b1474 | fdnG   | - | - | - | - | 0.158 | 0.186 | 0.082 |
| b1475 | fdnH   | - | - | - | - | 0.158 | 0.186 | 0.082 |
| b1476 | fdnI   | - | - | - | - | 0.158 | 0.186 | 0.082 |
| b1479 | sfcA   | - | - | - | - | 0.014 | 0.014 | 0.044 |
| b1492 | xasA   | - | - | - | - | 0     | 0     | 0.006 |
| b1493 | gadB   | - | - | - | - | 0.02  | 0.066 | 0.056 |
| b1519 | tam    | - | - | - | - | 0     | 0     | 0     |
| b1521 | uxaB   | - | - | - | - | 0     | 0     | 0     |
| b1524 | yneH   | - | - | - | - | 0     | 0     | 0     |
| b1584 | speG   | - | - | - | + | 0     | 0     | 0     |
| b1602 | pntB   | - | - | - | - | 0.068 | 0.122 | 0.03  |
| b1603 | pntA   | - | - | - | - | 0.068 | 0.122 | 0.03  |



|       |       |   |   |   |   |       |       |       |
|-------|-------|---|---|---|---|-------|-------|-------|
| b1605 | arcD  | - | - | - | - | 0.114 | 0.176 | 0     |
| b1611 | fumC  | - | - | - | + | 0.354 | 0.354 | 0.338 |
| b1612 | fumA  | - | - | - | - | 0.3   | 0.362 | 0.342 |
| b1613 | manA  | - | - | - | - | 0     | 0     | 0     |
| b1621 | malX  | - | - | - | - | 0     | 0.004 | 0.328 |
| b1622 | malY  | - | - | - | - | 0.056 | 0.094 | 0.49  |
| b1623 | add   | - | - | - | - | 0     | 0.002 | 0     |
| b1636 | pdxY  | - | - | - | - | 0     | 0     | 0     |
| b1638 | pdxH  | - | - | - | + | 0     | 0     | 0     |
| b1646 | sodC  | - | - | - | - | 0     | 0     | 0     |
| b1651 | gloA  | - | - | - | - | 0     | 0     | 0     |
| b1656 | sodB  | - | - | - | - | 0     | 0     | 0     |
| b1662 | ribE  | + | + | + | + | 1     | 1     | 1     |
| b1676 | pykF  | - | - | - | - | 0.426 | 0.528 | 0.362 |
| b1692 | ydiB  | - | - | - | - | 0.526 | 0.542 | 0.466 |
| b1693 | aroD  | - | - | - | - | 1     | 1     | 1     |
| b1702 | pps   | - | - | - | - | 0     | 0     | 0     |
| b1704 | aroH  | + | + | + | - | 0.336 | 0.334 | 0.34  |
| b1709 | btuD  | - | - | - | - | 0     | 0     | 0     |
| b1711 | btuC  | - | - | - | - | 0     | 0     | 0     |
| b1723 | pfkB  | - | - | - | - | 0     | 0     | 0.44  |
| b1732 | katE  | - | - | - | - | 0     | 0     | 0     |
| b1740 | nadE  | - | + | + | + | 0.454 | 0.33  | 1     |
| b1744 | astE  | - | - | - | - | 0     | 0     | 0     |
| b1745 | astB  | - | - | - | - | 0     | 0     | 0     |
| b1746 | astD  | - | - | - | - | 0     | 0     | 0     |
| b1747 | astA  | - | - | - | - | 0     | 0     | 0     |
| b1748 | astC  | - | - | - | - | 0     | 0     | 0     |
| b1761 | gdhA  | - | - | - | - | 1     | 1     | 1     |
| b1764 | selD  | - | - | - | - | 0     | 0     | 0     |
| b1767 | ansA  | - | - | - | - | 0     | 0     | 0     |
| b1768 | pncA  | - | - | - | - | 0     | 0.142 | 0     |
| b1773 | b1773 | - | - | - | - | 0.296 | 0.274 | 0.348 |
| b1779 | gapA  | + | + | + | + | 0.652 | 0.698 | 0.702 |
| b1801 | yeaV  | - | - | - | - | 0.014 | 0.004 | 0.012 |
| b1805 | fadD  | - | - | - | - | 0     | 0     | 0     |
| b1812 | pabB  | - | - | - | - | 1     | 1     | 1     |
| b1814 | sdaA  | - | - | - | - | 0.064 | 0.038 | 0.258 |
| b1817 | manX  | - | - | - | - | 0.052 | 0     | 0.298 |
| b1818 | manY  | - | - | - | - | 0.052 | 0     | 0.298 |
| b1819 | manZ  | - | - | - | - | 0.052 | 0     | 0.298 |

|       |        |   |   |   |   |       |       |       |
|-------|--------|---|---|---|---|-------|-------|-------|
| b1849 | purT   | - | - | - | + | 0.342 | 0.382 | 0.568 |
| b1850 | eda    | - | - | - | - | 0     | 0     | 0     |
| b1851 | edd    | - | - | - | - | 0     | 0     | 0     |
| b1852 | zwf    | + | + | + | - | 0.018 | 0.142 | 1     |
| b1854 | pykA   | + | + | + | + | 0.554 | 0.44  | 0.42  |
| b1855 | msbB   | - | - | - | - | 1     | 1     | 1     |
| b1865 | ntpA   | - | - | - | - | 0.512 | 0.502 | 0.52  |
| b1872 | torZ   | - | - | - | - | 0     | 0     | 0     |
| b1873 | torY   | - | - | - | - | 0     | 0     | 0     |
| b1896 | otsA   | - | - | - | - | 0     | 0     | 0     |
| b1897 | otsB   | - | - | - | - | 0     | 0     | 0     |
| b1898 | araH_2 | - | - | - | - | 0     | 0     | 0     |
| b1899 | araH_1 | - | - | - | - | 0     | 0     | 0     |
| b1900 | araG   | - | - | - | - | 0     | 0     | 0     |
| b1901 | araF   | - | - | - | - | 0     | 0     | 0     |
| b1907 | tyrP   | - | - | - | - | 0.008 | 0.006 | 0     |
| b1912 | pgsA   | - | - | - | + | 1     | 1     | 1     |
| b1982 | amn    | - | - | - | - | 0     | 0     | 0.002 |
| b1991 | cobT   | - | - | - | - | 0     | 0     | 0     |
| b1992 | cobS   | - | - | - | - | 0     | 0     | 0     |
| b1993 | cobU   | - | - | - | - | 0     | 0     | 0     |
| b2019 | hisG   | + | + | + | - | 0.292 | 0.228 | 1     |
| b2020 | hisD   | + | + | + | - | 0.292 | 0.228 | 1     |
| b2021 | hisC   | + | + | + | - | 0.292 | 0.228 | 1     |
| b2022 | hisB   | + | + | + | - | 0.292 | 0.228 | 1     |
| b2023 | hisH   | + | + | + | - | 0.292 | 0.228 | 1     |
| b2024 | hisA   | + | + | + | - | 0.292 | 0.228 | 1     |
| b2025 | hisF   | + | + | + | - | 0.292 | 0.228 | 1     |
| b2026 | hisI   | + | + | + | - | 0.292 | 0.228 | 1     |
| b2028 | ugd    | - | - | - | + | 0     | 0     | 0     |
| b2029 | gnd    | + | + | + | - | 0.018 | 0.142 | 1     |
| b2036 | glf    | - | - | - | - | 0     | 0     | 0     |
| b2038 | rfbC   | - | - | - | - | 0     | 0     | 0     |
| b2039 | rfbA   | - | - | - | - | 0     | 0     | 0     |
| b2040 | rfbD   | - | - | - | - | 0     | 0     | 0     |
| b2041 | rfbB   | - | - | - | - | 0     | 0     | 0     |
| b2042 | galF   | - | - | - | - | 0.45  | 0.536 | 0.474 |
| b2045 | wcaK   | - | - | - | - | 0.002 | 0.002 | 0     |
| b2048 | epsG   | - | - | - | - | 0     | 0     | 0     |
| b2049 | manC   | - | - | - | - | 0     | 0     | 0     |
| b2052 | fcl    | - | - | - | - | 0     | 0     | 0     |

|       |      |   |   |   |   |       |       |       |
|-------|------|---|---|---|---|-------|-------|-------|
| b2053 | gmd  | - | - | - | - | 0     | 0     | 0     |
| b2065 | dcd  | + | + | + | + | 0     | 0     | 0     |
| b2066 | udk  | - | - | - | - | 0.156 | 0.264 | 0.142 |
| b2091 | gatD | - | - | - | - | 0     | 0     | 0     |
| b2092 | gatC | - | - | - | - | 0     | 0     | 0     |
| b2093 | gatB | - | - | - | - | 0     | 0     | 0     |
| b2094 | gatA | - | - | - | - | 0     | 0     | 0     |
| b2095 | gatZ | - | - | - | - | 0     | 0     | 0     |
| b2096 | gatY | - | - | - | - | 0     | 0     | 0     |
| b2097 | fbaB | - | - | - | - | 0.264 | 0.28  | 0.322 |
| b2103 | thiD | - | - | - | + | 0     | 1     | 0     |
| b2104 | thiM | - | - | - | - | 0     | 0     | 0     |
| b2128 | yehW | - | - | - | - | 0     | 0     | 0     |
| b2129 | yehX | - | - | - | - | 0     | 0     | 0     |
| b2130 | yehY | - | - | - | - | 0     | 0     | 0     |
| b2131 | yehZ | - | - | - | - | 0     | 0     | 0     |
| b2132 | bglX | - | - | - | - | 0     | 0     | 0     |
| b2133 | dld  | - | - | - | - | 0     | 0     | 0     |
| b2143 | cdd  | - | - | - | - | 0.042 | 0.06  | 0.172 |
| b2148 | mglC | - | - | - | - | 0     | 0     | 0     |
| b2149 | mglA | - | - | - | - | 0     | 0     | 0     |
| b2150 | mglB | - | - | - | - | 0     | 0     | 0     |
| b2153 | folE | - | + | - | + | 1     | 1     | 1     |
| b2156 | lysP | - | - | - | - | 0.388 | 0.356 | 0     |
| b2167 | fruA | - | - | - | - | 0     | 0     | 0     |
| b2168 | fruK | - | - | - | - | 0     | 0     | 0     |
| b2169 | fruB | - | - | - | - | 0     | 0     | 0     |
| b2210 | mgo  | - | - | - | + | 0     | 0     | 0     |
| b2221 | atoD | - | - | - | - | 0     | 0     | 0     |
| b2222 | atoA | - | - | - | - | 0     | 0     | 0     |
| b2223 | atoE | - | - | - | - | 0     | 0     | 0     |
| b2224 | atoB | - | - | - | - | 0     | 0     | 0     |
| b2232 | ubiG | - | - | - | + | 0     | 1     | 0     |
| b2234 | nrdA | + | + | + | - | 0.366 | 0.364 | 0.312 |
| b2235 | nrdB | + | + | + | - | 0.366 | 0.364 | 0.312 |
| b2239 | glpQ | - | - | - | - | 0     | 0     | 0.006 |
| b2240 | glpT | - | - | - | - | 1     | 1     | 0     |
| b2241 | glpA | - | - | - | - | 0     | 0.002 | 0     |
| b2242 | glpB | - | - | - | - | 0     | 0.002 | 0     |
| b2243 | glpC | - | - | - | - | 0     | 0.002 | 0     |
| b2260 | menE | - | - | - | - | 0     | 0     | 0     |

|       |      |   |   |   |   |       |       |       |
|-------|------|---|---|---|---|-------|-------|-------|
| b2261 | menC | - | - | - | - | 0     | 0     | 0     |
| b2262 | menB | - | - | - | - | 0     | 0     | 0     |
| b2264 | menD | - | - | - | - | 0     | 0     | 0     |
| b2265 | menF | - | - | - | - | 0     | 0     | 0     |
| b2276 | nuoN | + | + | + | - | 1     | 1     | 1     |
| b2277 | nuoM | + | + | + | - | 1     | 1     | 1     |
| b2278 | nuoL | + | + | + | - | 1     | 1     | 1     |
| b2279 | nuoK | + | + | + | - | 1     | 1     | 1     |
| b2280 | nuoJ | + | + | + | - | 1     | 1     | 1     |
| b2281 | nuoI | + | + | + | - | 1     | 1     | 1     |
| b2282 | nuoH | + | + | + | - | 1     | 1     | 1     |
| b2283 | nuoG | + | + | + | - | 1     | 1     | 1     |
| b2284 | nuoF | + | + | + | - | 1     | 1     | 1     |
| b2285 | nuoE | + | + | + | - | 1     | 1     | 1     |
| b2286 | nuoC | + | + | + | - | 1     | 1     | 1     |
| b2287 | nuoB | + | + | + | - | 1     | 1     | 1     |
| b2288 | nuoA | + | + | + | - | 1     | 1     | 1     |
| b2296 | ackA | + | + | + | + | 0.294 | 0.256 | 0.16  |
| b2297 | pta  | + | + | + | + | 0.464 | 0.438 | 0.466 |
| b2306 | hisP | - | - | - | - | 0.12  | 0.104 | 0     |
| b2307 | hisM | - | - | - | - | 0.12  | 0.104 | 0     |
| b2308 | hisQ | - | - | - | - | 0.12  | 0.104 | 0     |
| b2309 | hisJ | - | - | - | - | 0.098 | 0.086 | 0     |
| b2310 | argT | - | - | - | - | 0.028 | 0.03  | 0     |
| b2311 | ubiX | - | - | - | + | 0     | 0.514 | 0     |
| b2312 | purF | - | - | - | + | 0.72  | 1     | 1     |
| b2315 | folC | + | + | + | + | 1     | 1     | 1     |
| b2316 | accD | - | - | - | + | 1     | 1     | 1     |
| b2320 | pdxB | - | - | - | + | 0     | 1     | 0     |
| b2323 | fabB | + | + | + | + | 1     | 1     | 1     |
| b2329 | aroC | + | + | + | - | 1     | 1     | 1     |
| b2344 | fadL | - | - | - | - | 0.934 | 0     | 0     |
| b2366 | dsdA | - | - | - | - | 0     | 0     | 0     |
| b2378 | lpxP | - | - | - | - | 0     | 0     | 0     |
| b2388 | glk  | - | - | - | - | 0.008 | 0.006 | 0.026 |
| b2393 | nupC | - | - | - | - | 0.046 | 0.102 | 0     |
| b2400 | gltX | + | + | + | + | 0     | 1     | 0     |
| b2406 | xapB | - | - | - | - | 0.062 | 0.088 | 0     |
| b2407 | xapA | - | - | - | - | 0.208 | 0.352 | 0.38  |
| b2411 | lig  | + | - | + | + | 0     | 0     | 0     |
| b2413 | cysZ | - | - | - | - | 0     | 0     | 0.348 |

|       |      |   |   |   |   |       |       |       |
|-------|------|---|---|---|---|-------|-------|-------|
| b2414 | cysK | - | + | + | - | 0     | 0     | 0.514 |
| b2415 | ptsH | + | + | + | - | 0.084 | 0.016 | 1     |
| b2416 | ptsI | + | + | + | - | 0.084 | 0.016 | 1     |
| b2417 | crr  | + | + | + | - | 0.002 | 0.004 | 0.702 |
| b2418 | pdxK | - | - | - | - | 0     | 0     | 0     |
| b2421 | cysM | - | - | - | - | 0     | 0     | 0.486 |
| b2422 | cysA | - | - | - | - | 0     | 0     | 1     |
| b2423 | cysW | - | - | - | - | 0     | 0     | 1     |
| b2424 | cysU | - | - | - | - | 0     | 0     | 1     |
| b2425 | cysP | - | - | - | - | 0     | 0     | 0.652 |
| b2429 | yfeV | - | - | - | - | 0     | 0     | 0     |
| b2436 | hemF | - | - | - | + | 0     | 1     | 0     |
| b2440 | eutC | - | - | - | - | 0     | 0     | 0.006 |
| b2441 | eutB | - | - | - | - | 0     | 0     | 0.006 |
| b2458 | eutD | - | - | - | - | 0.426 | 0.452 | 0.422 |
| b2463 | maeB | - | - | - | - | 0.054 | 0.09  | 0.094 |
| b2464 | talA | + | + | + | + | 0.504 | 0.5   | 0.482 |
| b2465 | tktB | + | - | - | - | 0.502 | 0.542 | 0.53  |
| b2472 | dapE | + | + | + | + | 0.704 | 1     | 1     |
| b2476 | purC | - | - | - | + | 0.72  | 0.846 | 1     |
| b2478 | dapA | + | + | + | + | 0.704 | 1     | 1     |
| b2492 | focB | - | - | - | - | 0.018 | 0.018 | 0.072 |
| b2497 | uraA | - | - | - | - | 0.012 | 0.042 | 0     |
| b2498 | upp  | - | - | - | - | 0.018 | 0.038 | 0.118 |
| b2499 | purM | - | - | - | + | 0.72  | 1     | 1     |
| b2500 | purN | - | - | - | - | 0.668 | 0.846 | 0.736 |
| b2507 | guaA | - | - | - | + | 0.674 | 0.758 | 1     |
| b2508 | guaB | - | - | - | + | 0.674 | 0.758 | 1     |
| b2515 | gcpE | - | + | + | + | 0     | 1     | 0     |
| b2518 | ndk  | - | - | - | + | 1     | 1     | 1     |
| b2530 | iscS | + | + | + | + | 0     | 1     | 0     |
| b2533 | suhB | + | + | + | + | 0     | 0     | 0     |
| b2536 | hcaT | - | - | - | - | 0     | 0     | 0     |
| b2538 | hcaE | - | - | - | - | 0     | 0     | 0     |
| b2539 | hcaF | - | - | - | - | 0     | 0     | 0     |
| b2540 | hcaC | - | - | - | - | 0     | 0     | 0     |
| b2541 | hcaB | - | - | - | - | 0     | 0     | 0     |
| b2542 | hcaD | - | - | - | - | 0     | 0     | 0     |
| b2551 | glyA | + | + | + | + | 1     | 1     | 1     |
| b2557 | purL | - | - | - | + | 0.72  | 1     | 1     |
| b2563 | acpS | + | + | + | + | 0     | 0     | 0     |

|       |      |   |   |   |   |       |       |       |
|-------|------|---|---|---|---|-------|-------|-------|
| b2564 | pdxJ | - | - | - | + | 0     | 1     | 0     |
| b2574 | nadB | - | - | - | - | 0.198 | 0.188 | 1     |
| b2585 | pssA | - | - | - | + | 1     | 1     | 1     |
| b2587 | kgtP | - | - | - | - | 0     | 0     | 0     |
| b2599 | pheA | + | + | + | - | 0.906 | 0.872 | 1     |
| b2600 | tyrA | - | - | - | - | 0.94  | 0.92  | 1     |
| b2601 | aroF | - | - | - | + | 0.352 | 0.362 | 0.334 |
| b2615 | yfjB | + | + | + | + | 1     | 1     | 1     |
| b2661 | gabD | - | - | - | - | 0.196 | 0.116 | 0.064 |
| b2662 | gabT | - | - | - | - | 0.11  | 0.056 | 0.052 |
| b2663 | gabP | - | - | - | - | 0     | 0     | 0.006 |
| b2675 | nrdE | - | - | - | + | 0     | 0     | 0     |
| b2676 | nrdF | - | - | - | + | 0     | 0     | 0     |
| b2677 | proV | - | - | - | - | 0     | 0.002 | 0     |
| b2678 | proW | - | - | - | - | 0     | 0.002 | 0     |
| b2679 | proX | - | - | - | - | 0     | 0.002 | 0     |
| b2687 | luxS | - | - | - | - | 0     | 0     | 0     |
| b2688 | gshA | + | + | + | + | 0     | 1     | 0     |
| b2690 | yqaB | - | - | - | - | 0.494 | 0.45  | 0.524 |
| b2702 | srIA | - | - | - | - | 0     | 0     | 0     |
| b2703 | srIE | - | - | - | - | 0     | 0     | 0     |
| b2704 | srIB | - | - | - | - | 0     | 0     | 0     |
| b2705 | srID | - | - | - | - | 0     | 0     | 0     |
| b2719 | hycG | - | - | - | - | 0     | 0     | 0     |
| b2720 | hycF | - | - | - | - | 0     | 0     | 0     |
| b2721 | hycE | - | - | - | - | 0     | 0     | 0     |
| b2722 | hycD | - | - | - | - | 0     | 0     | 0     |
| b2723 | hycC | - | - | - | - | 0     | 0     | 0     |
| b2724 | hycB | - | - | - | - | 0     | 0     | 0     |
| b2738 | ygbL | - | - | - | - | 0     | 0     | 0     |
| b2746 | ispF | - | + | + | + | 0     | 1     | 0     |
| b2747 | ispD | - | + | + | + | 0     | 1     | 0     |
| b2750 | cysC | - | + | + | - | 0     | 0     | 1     |
| b2751 | cysN | - | - | + | - | 0     | 0     | 1     |
| b2752 | cysD | - | - | + | - | 0     | 0     | 1     |
| b2762 | cysH | - | - | + | - | 0     | 0     | 1     |
| b2763 | cysI | - | - | + | - | 0     | 0     | 1     |
| b2764 | cysJ | - | + | + | - | 0     | 0     | 1     |
| b2779 | eno  | + | + | + | + | 0.984 | 0.978 | 1     |
| b2780 | pyrG | + | + | + | + | 0.946 | 0.918 | 1     |
| b2781 | mazG | - | - | - | - | 0     | 0     | 0     |

|       |      |   |   |   |   |       |       |       |
|-------|------|---|---|---|---|-------|-------|-------|
| b2787 | gudD | - | - | - | - | 0     | 0     | 0     |
| b2788 | ygcY | - | - | - | - | 0     | 0     | 0     |
| b2789 | gudP | - | - | - | - | 0     | 0     | 0     |
| b2796 | sdaC | - | - | - | + | 0     | 0     | 0     |
| b2797 | sdaB | - | - | - | - | 0.06  | 0.05  | 0.262 |
| b2799 | fucO | - | - | - | - | 0     | 0     | 0     |
| b2800 | fucA | - | - | - | - | 0     | 0     | 0     |
| b2801 | fucP | - | - | - | - | 0     | 0     | 0     |
| b2802 | fucI | - | - | - | - | 0     | 0     | 0     |
| b2803 | fucK | - | - | - | - | 0     | 0     | 0     |
| b2818 | argA | - | + | + | - | 0.678 | 0.652 | 1     |
| b2827 | thyA | + | + | + | + | 0.874 | 0.784 | 1     |
| b2836 | aas  | - | - | - | - | 0.934 | 0     | 0.006 |
| b2838 | lysA | + | + | + | - | 0.644 | 0.71  | 1     |
| b2841 | araE | - | - | - | - | 0     | 0     | 0     |
| b2874 | yqeA | - | - | - | - | 0.336 | 0.326 | 0.332 |
| b2883 | ygfP | - | - | - | - | 0     | 0     | 0     |
| b2889 | idi  | - | - | - | - | 0     | 0     | 0     |
| b2901 | bglA | - | - | - | - | 0     | 0     | 0     |
| b2903 | gcvP | - | - | - | - | 0     | 0.004 | 0.11  |
| b2904 | gcvH | - | - | - | - | 0     | 0.004 | 0.11  |
| b2905 | gcvT | - | - | - | - | 0     | 0.004 | 0.11  |
| b2907 | ubiH | - | - | - | + | 0     | 1     | 0     |
| b2913 | serA | - | - | - | - | 1     | 1     | 1     |
| b2914 | rpiA | + | + | + | + | 0.5   | 0.496 | 0.462 |
| b2917 | sbm  | - | - | - | - | 0     | 0     | 0.002 |
| b2919 | ygfG | - | - | - | - | 0     | 0     | 0.002 |
| b2920 | ygfH | - | - | - | - | 0     | 0.04  | 0.014 |
| b2925 | fbaA | + | + | + | + | 0.31  | 0.336 | 0.304 |
| b2926 | pgk  | + | + | + | + | 1     | 1     | 1     |
| b2927 | epd  | - | - | - | - | 0     | 1     | 0     |
| b2935 | tktA | - | + | + | + | 0.498 | 0.458 | 0.47  |
| b2937 | speB | - | - | - | - | 0     | 0.018 | 0.098 |
| b2938 | speA | - | - | - | - | 0     | 0.006 | 0.064 |
| b2942 | metK | - | + | + | + | 0.184 | 1     | 1     |
| b2943 | galP | - | - | - | - | 0.004 | 0.006 | 0.026 |
| b2947 | gshB | + | + | + | + | 0     | 1     | 0     |
| b2957 | ansB | - | - | - | - | 0     | 0     | 0     |
| b2964 | nupG | - | - | - | - | 0.074 | 0.1   | 0     |
| b2965 | speC | - | - | - | - | 0.014 | 0.532 | 0.452 |
| b2975 | glcA | - | - | - | - | 0.08  | 0.088 | 0.276 |

|       |       |   |   |   |   |       |       |       |
|-------|-------|---|---|---|---|-------|-------|-------|
| b2976 | glcB  | - | - | - | - | 0.452 | 0.484 | 0.354 |
| b2978 | glcF  | - | - | - | - | 0.82  | 0.804 | 0.412 |
| b2979 | glcD  | - | - | - | - | 0.82  | 0.804 | 0.412 |
| b2987 | pitB  | - | - | - | - | 0.5   | 0.486 | 0.494 |
| b2988 | gsp   | - | - | - | - | 0     | 0     | 0     |
| b2994 | hybC  | - | - | - | - | 0     | 0     | 0     |
| b2997 | hybO  | - | - | - | - | 0     | 0     | 0     |
| b3008 | metC  | - | - | - | - | 0.086 | 0.098 | 0.51  |
| b3012 | yqhE  | - | - | - | - | 0     | 0     | 0     |
| b3018 | plsC  | - | - | - | + | 1     | 1     | 1     |
| b3041 | ribB  | + | + | + | + | 1     | 1     | 1     |
| b3052 | rfaE  | - | + | + | - | 1     | 1     | 1     |
| b3058 | folB  | - | - | - | + | 1     | 1     | 1     |
| b3061 | ttdA  | - | - | - | - | 0     | 0     | 0     |
| b3062 | ttdB  | - | - | - | - | 0     | 0     | 0     |
| b3063 | ygjE  | - | - | - | - | 0     | 0     | 0     |
| b3073 | ygjG  | - | - | - | - | 0.002 | 0.004 | 0     |
| b3089 | sstT  | - | - | - | - | 0.002 | 0     | 0     |
| b3091 | uxaA  | - | - | - | - | 0     | 0     | 0     |
| b3092 | uxaC  | - | - | - | - | 0     | 0     | 0     |
| b3093 | exuT  | - | - | - | - | 0     | 0     | 0     |
| b3111 | tdcGa | - | - | - | - | 0     | 0     | 0     |
| b3112 | tdcGb | - | - | - | - | 0     | 0     | 0     |
| b3114 | tdcE  | - | - | - | - | 0     | 0.002 | 0.138 |
| b3115 | tdcD  | - | - | - | - | 0.264 | 0.258 | 0.202 |
| b3116 | tdcC  | - | - | - | - | 0.004 | 0.008 | 0     |
| b3117 | tdcB  | - | - | - | - | 0.044 | 0.036 | 0.246 |
| b3124 | garK  | - | - | - | - | 0     | 0.002 | 0.002 |
| b3125 | garR  | - | - | - | - | 0     | 0.006 | 0.002 |
| b3126 | garL  | - | - | - | - | 0     | 0     | 0     |
| b3127 | garP  | - | - | - | - | 0     | 0     | 0     |
| b3128 | garD  | - | - | - | - | 0     | 0     | 0     |
| b3132 | agaZ  | - | - | - | - | 0     | 0     | 0     |
| b3137 | agaY  | - | - | - | - | 0     | 0     | 0     |
| b3161 | mtr   | - | - | - | - | 0.87  | 0.842 | 0     |
| b3172 | argG  | + | + | + | - | 0.884 | 0.824 | 1     |
| b3176 | mrsA  | + | - | + | + | 1     | 1     | 1     |
| b3177 | folP  | - | - | - | + | 1     | 1     | 1     |
| b3187 | ispB  | - | - | - | + | 0     | 1     | 0     |
| b3189 | murA  | + | + | + | + | 1     | 1     | 1     |
| b3212 | gltB  | - | - | - | - | 0     | 0     | 0     |



|       |      |   |   |   |   |       |       |       |
|-------|------|---|---|---|---|-------|-------|-------|
| b3213 | gltD | - | - | - | - | 0     | 0     | 0     |
| b3222 | nanK | - | - | - | - | 0.006 | 0     | 0     |
| b3223 | nanE | - | - | - | - | 0.006 | 0     | 0     |
| b3224 | nanT | - | - | - | - | 0.006 | 0     | 0     |
| b3225 | nanA | - | - | - | - | 0.006 | 0     | 0     |
| b3236 | mdh  | - | - | - | - | 1     | 1     | 1     |
| b3255 | accB | - | - | - | + | 1     | 1     | 1     |
| b3256 | accC | - | - | - | + | 1     | 1     | 1     |
| b3258 | panF | - | - | - | - | 0.73  | 0     | 0     |
| b3281 | aroE | + | + | + | - | 0.474 | 0.458 | 0.534 |
| b3359 | argD | - | + | + | - | 0.668 | 0.644 | 1     |
| b3360 | pabA | - | - | - | - | 1     | 1     | 1     |
| b3365 | nirB | - | - | - | - | 0     | 0     | 0     |
| b3366 | nirD | - | - | - | - | 0     | 0     | 0     |
| b3367 | nirC | - | - | - | - | 0     | 0     | 0     |
| b3368 | cysG | - | - | + | - | 0     | 0     | 0     |
| b3380 | yhfW | - | - | - | - | 0.256 | 0.346 | 0.102 |
| b3385 | gph  | - | - | - | - | 0     | 0     | 0     |
| b3386 | rpe  | + | + | + | + | 0.504 | 0.508 | 0.498 |
| b3389 | aroB | + | + | + | - | 1     | 1     | 1     |
| b3390 | aroK | + | + | + | + | 0.51  | 0.486 | 0.48  |
| b3403 | pckA | - | - | - | + | 0.016 | 0.032 | 0.03  |
| b3409 | feoB | - | - | - | - | 0     | 1     | 0     |
| b3415 | gntT | - | - | - | - | 0     | 0     | 0     |
| b3416 | malQ | - | - | - | - | 0.006 | 0.002 | 0     |
| b3417 | malP | - | - | - | - | 0.006 | 0.002 | 0     |
| b3425 | glpE | - | - | - | - | 0     | 0     | 0     |
| b3426 | glpD | - | - | - | - | 0     | 0     | 0     |
| b3428 | glgP | - | - | - | - | 0     | 0     | 0     |
| b3429 | glgA | - | - | - | - | 1     | 1     | 1     |
| b3430 | glgC | - | - | - | - | 1     | 1     | 1     |
| b3433 | asd  | + | + | + | + | 0.864 | 1     | 1     |
| b3437 | gntK | - | - | - | - | 0     | 0     | 0     |
| b3450 | ugpC | - | - | - | - | 0     | 0.004 | 0     |
| b3451 | ugpE | - | - | - | - | 0     | 0.004 | 0     |
| b3452 | ugpA | - | - | - | - | 0     | 0.004 | 0     |
| b3453 | ugpB | - | - | - | - | 0     | 0.004 | 0     |
| b3454 | livF | - | - | - | - | 0.02  | 0.018 | 0     |
| b3455 | livG | - | - | - | - | 0.02  | 0.018 | 0     |
| b3456 | livM | - | - | - | - | 0.02  | 0.018 | 0     |
| b3457 | livH | - | - | - | - | 0.02  | 0.018 | 0     |

|       |      |   |   |   |   |       |       |       |
|-------|------|---|---|---|---|-------|-------|-------|
| b3458 | livK | - | - | - | - | 0.002 | 0     | 0     |
| b3460 | livJ | - | - | - | - | 0.018 | 0.018 | 0     |
| b3493 | pitA | + | + | + | + | 0.5   | 0.506 | 0.482 |
| b3500 | gor  | - | - | - | - | 0     | 0     | 0     |
| b3517 | gadA | - | - | - | - | 0.024 | 0.052 | 0.054 |
| b3519 | treF | - | - | - | - | 0     | 0     | 0     |
| b3526 | kdgK | - | - | - | - | 0     | 0     | 0     |
| b3528 | dctA | - | - | - | - | 0     | 0     | 0     |
| b3551 | bisC | - | - | - | - | 0     | 0     | 0     |
| b3553 | yiaE | - | - | - | - | 0     | 0     | 0.002 |
| b3564 | xylB | - | - | - | - | 0     | 0     | 0     |
| b3565 | xylA | - | - | - | - | 0     | 0     | 0     |
| b3566 | xylF | - | - | - | - | 0     | 0     | 0     |
| b3567 | xylG | - | - | - | - | 0     | 0     | 0     |
| b3568 | xylH | - | - | - | - | 0     | 0     | 0     |
| b3572 | avtA | - | - | - | - | 0.296 | 0.328 | 0     |
| b3575 | yiaK | - | - | - | - | 0     | 0     | 0     |
| b3579 | yiaO | - | - | - | - | 0     | 0     | 0     |
| b3581 | sgbH | - | - | - | - | 0     | 0     | 0     |
| b3583 | sgbE | - | - | - | - | 0     | 0     | 0     |
| b3588 | aldB | - | - | - | - | 0     | 0     | 0     |
| b3599 | mtlA | + | + | + | - | 0     | 0     | 0     |
| b3600 | mtlD | + | + | + | - | 0     | 0     | 0     |
| b3603 | lldP | - | - | - | - | 0.1   | 0.108 | 0.312 |
| b3605 | lldD | - | - | - | - | 0     | 0     | 0     |
| b3607 | cysE | + | + | + | - | 0     | 0     | 1     |
| b3608 | gpsA | - | - | - | + | 1     | 1     | 1     |
| b3612 | yibO | - | - | - | - | 0.31  | 0.284 | 0.32  |
| b3616 | tdh  | - | - | - | - | 0.01  | 0     | 0.012 |
| b3617 | kbl  | - | - | - | - | 0.01  | 0     | 0.012 |
| b3619 | rfaD | - | - | - | - | 1     | 1     | 1     |
| b3620 | rfaF | - | - | - | - | 1     | 1     | 1     |
| b3621 | rfaC | - | - | - | - | 1     | 1     | 1     |
| b3622 | rfaL | - | - | - | - | 1     | 1     | 1     |
| b3626 | rfaJ | - | - | - | - | 1     | 1     | 1     |
| b3627 | rfaI | - | - | - | - | 1     | 1     | 1     |
| b3631 | rfaG | - | - | - | - | 1     | 1     | 1     |
| b3633 | kdtA | - | - | - | + | 1     | 1     | 1     |
| b3634 | coaD | - | + | + | + | 1     | 0     | 1     |
| b3640 | dut  | + | + | + | + | 0.124 | 0.13  | 0.252 |
| b3642 | pyrE | + | - | + | + | 0.892 | 0.82  | 1     |

|       |        |   |   |   |   |       |       |       |
|-------|--------|---|---|---|---|-------|-------|-------|
| b3648 | gmk    | + | + | + | + | 1     | 1     | 1     |
| b3653 | gltS   | - | - | - | - | 0     | 0     | 0.006 |
| b3654 | yicE   | - | - | - | - | 0.284 | 0.198 | 0.046 |
| b3665 | yicP   | - | - | - | - | 0.018 | 0.11  | 0.098 |
| b3666 | uhpT   | - | - | - | - | 0.056 | 0.032 | 0     |
| b3670 | ilvN   | - | - | - | - | 0.358 | 0.322 | 0.36  |
| b3671 | ilvB   | - | - | - | - | 0.358 | 0.322 | 0.36  |
| b3691 | dgoT   | - | - | - | - | 0     | 0     | 0     |
| b3692 | dgoA   | - | - | - | - | 0     | 0     | 0     |
| b3693 | dgoK   | - | - | - | - | 0     | 0     | 0     |
| b3708 | tnaA   | - | - | - | - | 0.742 | 0.742 | 0.278 |
| b3709 | tnaB   | - | - | - | - | 0.028 | 0.018 | 0     |
| b3725 | pstB   | - | - | - | - | 0     | 0.004 | 0.024 |
| b3726 | pstA   | - | - | - | - | 0     | 0.004 | 0.024 |
| b3727 | pstC   | - | - | - | - | 0     | 0.004 | 0.024 |
| b3728 | pstS   | - | - | - | - | 0     | 0.004 | 0.024 |
| b3729 | glmS   | + | + | + | + | 0.92  | 1     | 1     |
| b3730 | glmU   | + | + | + | + | 1     | 1     | 1     |
| b3731 | atpC   | + | + | + | + | 1     | 1     | 1     |
| b3732 | atpD   | + | + | + | + | 1     | 1     | 1     |
| b3733 | atpG   | + | + | + | + | 1     | 1     | 1     |
| b3734 | atpA   | + | + | + | + | 1     | 1     | 1     |
| b3735 | atpH   | + | + | + | + | 1     | 1     | 1     |
| b3736 | atpF   | + | + | + | + | 1     | 1     | 1     |
| b3737 | atpE   | + | + | + | + | 1     | 1     | 1     |
| b3738 | atpB   | + | + | + | + | 1     | 1     | 1     |
| b3739 | atpI   | - | - | - | - | 1     | 1     | 1     |
| b3744 | asnA   | - | - | - | - | 0.934 | 0.914 | 0.694 |
| b3748 | rbsD   | - | - | - | - | 0     | 0     | 0     |
| b3749 | rbsA   | - | - | - | - | 0     | 0     | 0     |
| b3750 | rbsC   | - | - | - | - | 0     | 0     | 0     |
| b3751 | rbsB   | - | - | - | - | 0     | 0     | 0     |
| b3752 | rbsK   | - | - | - | - | 0     | 0     | 0     |
| b3767 | ilvG_1 | ? | ? | ? | ? | 0.216 | 0.23  | 0.226 |
| b3768 | ilvG_2 | ? | ? | ? | ? | 0.216 | 0.23  | 0.226 |
| b3769 | ilvM   | - | - | - | - | 0.216 | 0.23  | 0.226 |
| b3770 | ilvE   | - | - | - | - | 0.65  | 0.67  | 1     |
| b3771 | ilvD   | + | + | + | - | 0.942 | 0.958 | 1     |
| b3772 | ilvA   | - | - | - | - | 0.04  | 0.036 | 0.234 |
| b3774 | ilvC   | + | + | + | - | 0.944 | 0.97  | 1     |
| b3784 | wecA   | - | - | - | - | 0     | 0     | 0     |

|       |      |   |   |   |   |       |       |       |
|-------|------|---|---|---|---|-------|-------|-------|
| b3786 | wecB | - | - | - | - | 0     | 0     | 0     |
| b3787 | wecC | - | - | - | - | 0     | 0     | 0     |
| b3788 | rffG | - | - | - | - | 0     | 0     | 0     |
| b3789 | rffH | - | - | - | - | 0     | 0     | 0     |
| b3790 | wecD | - | - | - | - | 0     | 0     | 0     |
| b3791 | wecE | - | - | - | + | 0     | 0     | 0     |
| b3793 | wecF | - | - | - | - | 0     | 0     | 0     |
| b3794 | wecG | - | - | - | - | 0     | 0     | 0     |
| b3803 | hemX | - | - | - | - | 0     | 0     | 0     |
| b3804 | hemD | - | - | - | + | 0     | 1     | 0     |
| b3805 | hemC | - | - | + | + | 0     | 1     | 0     |
| b3806 | cyaA | - | - | - | - | 0     | 0     | 0     |
| b3809 | dapF | + | + | + | + | 0.704 | 1     | 1     |
| b3821 | pldA | - | - | - | - | 0     | 0     | 0.006 |
| b3825 | pldB | - | - | - | - | 0     | 0     | 0.006 |
| b3829 | metE | + | + | + | - | 0.08  | 0.52  | 0.51  |
| b3831 | udp  | - | - | - | - | 0.16  | 0.214 | 0.17  |
| b3833 | ubiE | - | - | - | + | 0     | 1     | 0     |
| b3835 | ubiB | - | - | - | + | 0     | 1     | 0     |
| b3843 | yigC | - | - | - | + | 0     | 0.486 | 0     |
| b3845 | fadA | - | - | - | - | 0     | 0     | 0     |
| b3846 | fadB | - | - | - | - | 0     | 0     | 0     |
| b3849 | trkH | - | - | - | + | 0     | 0     | 0     |
| b3850 | hemG | - | - | - | + | 0     | 1     | 0     |
| b3870 | glnA | - | - | - | + | 0.472 | 0.468 | 0.49  |
| b3892 | fdoI | - | - | - | - | 0.174 | 0.146 | 0.06  |
| b3893 | fdoH | - | - | - | - | 0.174 | 0.146 | 0.06  |
| b3894 | fdoG | - | - | - | - | 0.174 | 0.146 | 0.06  |
| b3902 | rhaD | - | - | - | - | 0     | 0     | 0     |
| b3903 | rhaA | - | - | - | - | 0     | 0     | 0     |
| b3904 | rhaB | - | - | - | - | 0     | 0     | 0     |
| b3907 | rhaT | - | - | - | - | 0     | 0     | 0     |
| b3908 | sodA | + | + | + | + | 0     | 0     | 0     |
| b3909 | kdgT | - | - | - | - | 0     | 0     | 0     |
| b3916 | pfkA | + | + | + | - | 0     | 0     | 0.534 |
| b3917 | sbp  | - | - | - | - | 0     | 0     | 0.348 |
| b3918 | cdh  | - | - | - | - | 0     | 0     | 0     |
| b3919 | tpiA | + | + | + | + | 1     | 1     | 1     |
| b3926 | glpK | - | - | - | - | 0.418 | 0.416 | 0.398 |
| b3927 | glpF | - | + | + | - | 0.212 | 0.21  | 0.276 |
| b3929 | menG | - | - | - | - | 0     | 0     | 0     |

|       |      |   |   |   |   |       |       |       |
|-------|------|---|---|---|---|-------|-------|-------|
| b3930 | menA | - | - | - | - | 0     | 0     | 0     |
| b3939 | metB | - | - | - | - | 0.142 | 0.192 | 1     |
| b3940 | metL | - | - | - | - | 0.37  | 0.386 | 0.502 |
| b3941 | metF | + | + | + | - | 1     | 1     | 1     |
| b3942 | katG | - | - | - | - | 0     | 0     | 0     |
| b3945 | gldA | - | - | - | - | 0.52  | 0.5   | 0.362 |
| b3946 | talC | - | - | - | - | 0.246 | 0.234 | 0.102 |
| b3951 | pflD | - | - | - | - | 0     | 0     | 0.054 |
| b3952 | pflC | - | - | - | - | 0     | 0     | 0.054 |
| b3956 | ppc  | - | - | - | - | 0.098 | 0.526 | 0.482 |
| b3957 | argE | - | + | + | - | 0.678 | 0.652 | 1     |
| b3958 | argC | - | + | + | - | 0.678 | 0.652 | 1     |
| b3959 | argB | - | + | + | - | 0.678 | 0.652 | 1     |
| b3960 | argH | + | + | + | - | 0.884 | 0.824 | 1     |
| b3962 | sthA | - | - | - | - | 0.072 | 0.024 | 0.032 |
| b3966 | btuB | - | - | - | - | 0     | 0     | 0     |
| b3967 | murI | + | + | + | + | 1     | 1     | 1     |
| b3972 | murB | + | + | + | + | 1     | 1     | 1     |
| b3974 | coaA | - | - | - | + | 1     | 0     | 1     |
| b3990 | thiH | - | - | - | + | 0     | 1     | 0     |
| b3991 | thiG | - | - | - | + | 0     | 1     | 0     |
| b3992 | thiF | - | - | - | - | 0     | 1     | 0     |
| b3993 | thiE | - | - | - | + | 0     | 1     | 0     |
| b3994 | thiC | - | - | - | + | 0     | 1     | 0     |
| b3997 | hemE | - | - | - | + | 0     | 1     | 0     |
| b4005 | purD | - | - | - | + | 0.72  | 1     | 1     |
| b4006 | purH | + | + | + | + | 0.8   | 0.886 | 1     |
| b4013 | metA | - | - | - | - | 0.142 | 0.192 | 1     |
| b4014 | aceB | - | - | - | - | 0.546 | 0.488 | 0.28  |
| b4015 | aceA | - | - | - | - | 0.978 | 0.95  | 0.544 |
| b4019 | metH | - | - | - | - | 0.062 | 0.48  | 0.49  |
| b4024 | lysC | - | - | - | - | 0.154 | 0.254 | 0     |
| b4025 | pgi  | + | + | + | + | 0.934 | 0.956 | 0.92  |
| b4031 | xylE | - | - | - | - | 0     | 0     | 0     |
| b4032 | malG | - | - | - | - | 0.006 | 0.002 | 0     |
| b4033 | malF | - | - | - | - | 0.006 | 0.002 | 0     |
| b4034 | malE | - | - | - | - | 0.006 | 0.002 | 0     |
| b4035 | malK | - | - | - | - | 0.006 | 0.002 | 0     |
| b4036 | lamB | - | - | - | - | 0.006 | 0.002 | 0     |
| b4039 | ubiC | - | - | - | - | 0     | 1     | 0     |
| b4040 | ubiA | - | - | - | + | 0     | 1     | 0     |

|       |      |   |   |   |   |       |       |       |
|-------|------|---|---|---|---|-------|-------|-------|
| b4041 | plsB | - | - | - | + | 1     | 1     | 1     |
| b4042 | dgkA | - | - | - | - | 1     | 1     | 1     |
| b4053 | alr  | - | - | - | - | 0.494 | 0.506 | 0.472 |
| b4054 | tyrB | - | - | - | - | 0.224 | 0.23  | 0     |
| b4069 | acs  | - | - | - | - | 0.082 | 0.068 | 0.112 |
| b4077 | glfP | - | - | - | - | 0     | 0     | 0.01  |
| b4079 | fdhF | - | - | - | - | 0.634 | 0.638 | 0.338 |
| b4090 | rpiB | - | - | - | - | 0.5   | 0.504 | 0.538 |
| b4111 | proP | - | - | - | - | 0.052 | 0.082 | 0     |
| b4117 | adiA | - | - | - | - | 0     | 0.012 | 0.034 |
| b4119 | melA | - | - | - | - | 0     | 0     | 0     |
| b4120 | melB | - | - | - | - | 0     | 0     | 0     |
| b4122 | fumB | - | - | - | - | 0.346 | 0.284 | 0.32  |
| b4123 | dcuB | - | - | - | - | 0     | 0     | 0     |
| b4131 | cadA | - | - | - | - | 0     | 0     | 0     |
| b4132 | cadB | - | - | - | - | 0     | 0     | 0     |
| b4138 | dcuA | - | - | - | - | 0     | 0     | 0     |
| b4139 | aspA | - | - | - | + | 0.088 | 0.016 | 0.03  |
| b4151 | frdD | - | - | - | - | 0     | 0     | 0     |
| b4152 | frdC | - | - | - | - | 0     | 0     | 0     |
| b4153 | frdB | - | - | - | - | 0     | 0     | 0     |
| b4154 | frdA | - | - | - | - | 0     | 0     | 0     |
| b4160 | psd  | - | - | - | + | 1     | 1     | 1     |
| b4177 | purA | + | + | + | + | 0.764 | 0.836 | 1     |
| b4196 | sgaH | - | - | - | - | 0     | 0     | 0     |
| b4197 | sgaU | - | - | - | - | 0     | 0     | 0     |
| b4198 | sgaE | - | - | - | - | 0     | 0     | 0     |
| b4208 | cycA | - | - | - | - | 0.008 | 0.032 | 0.014 |
| b4226 | ppa  | + | + | + | + | 1     | 1     | 1     |
| b4227 | ytfQ | - | - | - | - | 0     | 0     | 0     |
| b4228 | ytfR | - | - | - | - | 0     | 0     | 0     |
| b4229 | ytfS | - | - | - | - | 0     | 0     | 0     |
| b4230 | ytfT | - | - | - | - | 0     | 0     | 0     |
| b4231 | yjfF | - | - | - | - | 0     | 0     | 0     |
| b4232 | fbp  | - | - | - | + | 0.87  | 0.89  | 0     |
| b4238 | nrdD | - | - | - | - | 0.634 | 0.636 | 0.688 |
| b4239 | treC | - | - | - | - | 0     | 0     | 0     |
| b4240 | treB | - | - | - | - | 0     | 0     | 0     |
| b4244 | pyrI | - | + | + | + | 0.892 | 0.82  | 1     |
| b4245 | pyrB | - | + | + | + | 0.892 | 0.82  | 1     |
| b4254 | argI | - | - | - | - | 0.484 | 0.436 | 0.498 |

|       |      |   |   |   |   |       |       |       |
|-------|------|---|---|---|---|-------|-------|-------|
| b4265 | idnT | - | - | - | - | 0     | 0     | 0     |
| b4266 | idnO | - | - | - | - | 0     | 0     | 0     |
| b4267 | idnD | - | - | - | - | 0.09  | 0.036 | 0.032 |
| b4268 | idnK | - | - | - | - | 0     | 0     | 0     |
| b4301 | sgcE | - | - | - | - | 0.494 | 0.482 | 0.486 |
| b4321 | gntP | - | - | - | - | 0     | 0     | 0     |
| b4322 | uxuA | - | - | - | - | 0     | 0     | 0     |
| b4323 | uxuB | - | - | - | - | 0     | 0     | 0     |
| b4381 | deoC | - | - | - | - | 0.006 | 0.006 | 0.55  |
| b4382 | deoA | - | - | - | - | 0.006 | 0.004 | 0.082 |
| b4383 | deoB | + | + | + | - | 0.252 | 0.302 | 0.6   |
| b4384 | deoD | + | + | + | - | 0.254 | 0.34  | 0.352 |
| b4388 | serB | - | - | - | - | 1     | 1     | 1     |
| b4395 | gpmB | - | - | - | - | 0.334 | 0.332 | 0.36  |
| b4407 | thiS | - | - | - | - | 0     | 1     | 0     |
